# Supplementary material
Source: Research Square preprint supplement (doi:10.21203/rs.3.rs-9533264/v1)
Supplement: Supplementary file 1 [file dde854dcd165ddeb65e9ca51.pdf]

# Appendix

**Figure A1: Transition Matrices**

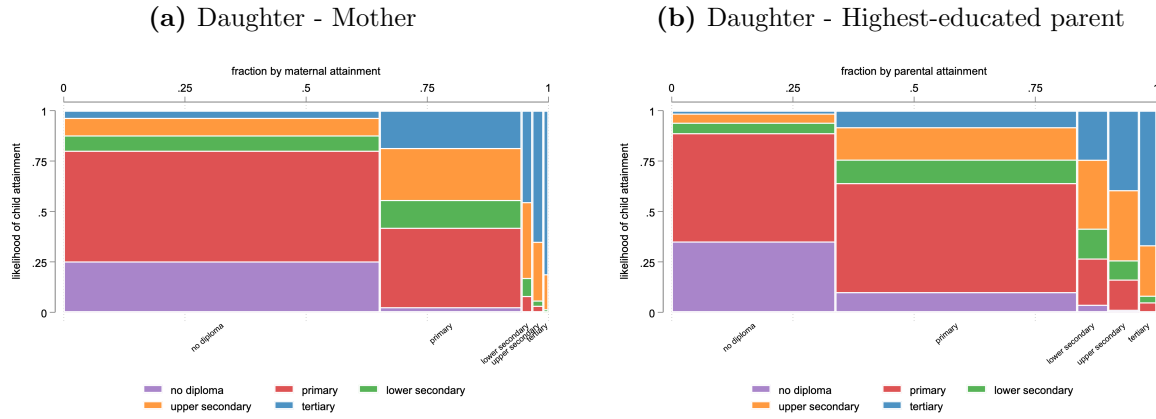

*Notes:* Both samples are pooled from 2003, 2008, 2013, and 2018 TDHS. Panel A includes mothers and their daughters while Panel B consists of the highest-educated parents and their daughters in the household. In both samples, daughters were born between 1955-1995, at least 23 at the survey year, resided in Turkiye at age 12. All statistics are calculated using sampling weights.

**Figure A2: Transition Probabilities across Cohorts with Mobility to Tertiary**

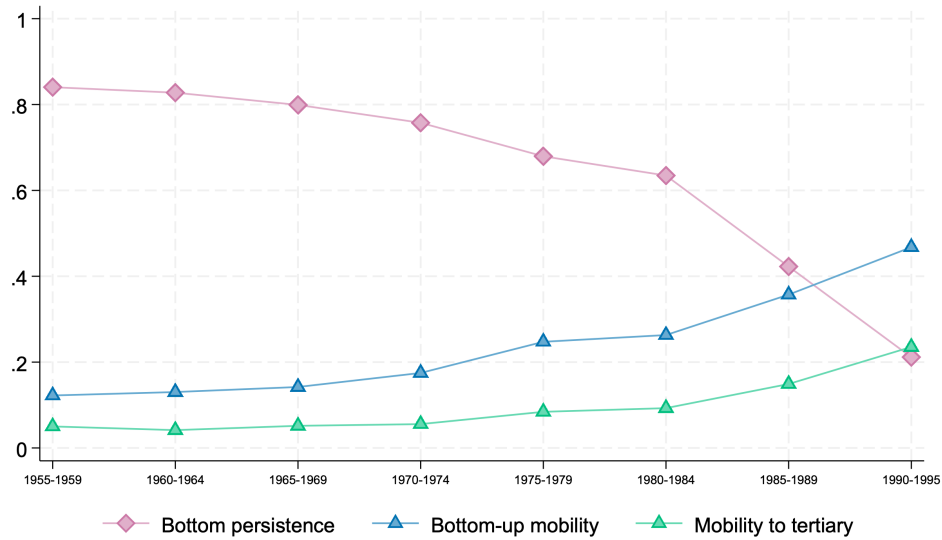

*Notes:* The figure reports cohort-specific transition probabilities for daughters born 1955-1995 who are aged at least 23 at interview, resided in Turkiye at age 12, and whose mothers attained at most primary schooling. Each point is the weighted mean within 5-year birth-cohort bins, pooling all survey waves used in the analysis. Bottom persistence is the probability of attaining at most primary schooling conditional on having a low-educated mother. Bottom-up mobility is the probability of attaining at least upper secondary schooling conditional on having a low-educated mother. Mobility to tertiary is the probability of attaining at least tertiary education conditional on having a low-educated mother.

**Figure A3: Bottom Persistence by Maternal Education**

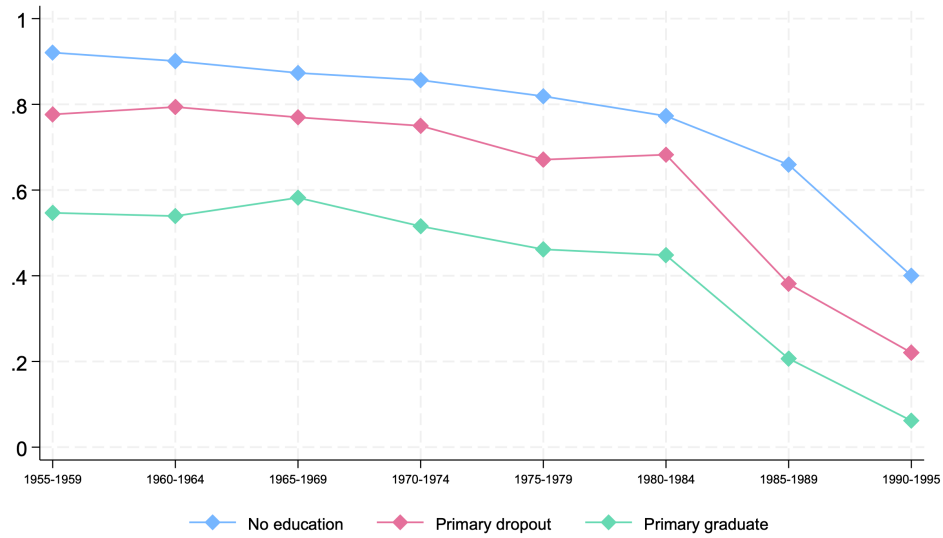

*Notes:* The figure reports cohort-specific transition probabilities for daughters born 1955-1995 who are aged at least 23 at interview, resided in Turkiye at age 12, and whose mothers attained at most primary schooling. Each point is the weighted mean within 5-year birth-cohort bins, pooling all survey waves used in the analysis.

**Figure A4: Transition Probabilities across Cohorts with Highest-educated Parent**

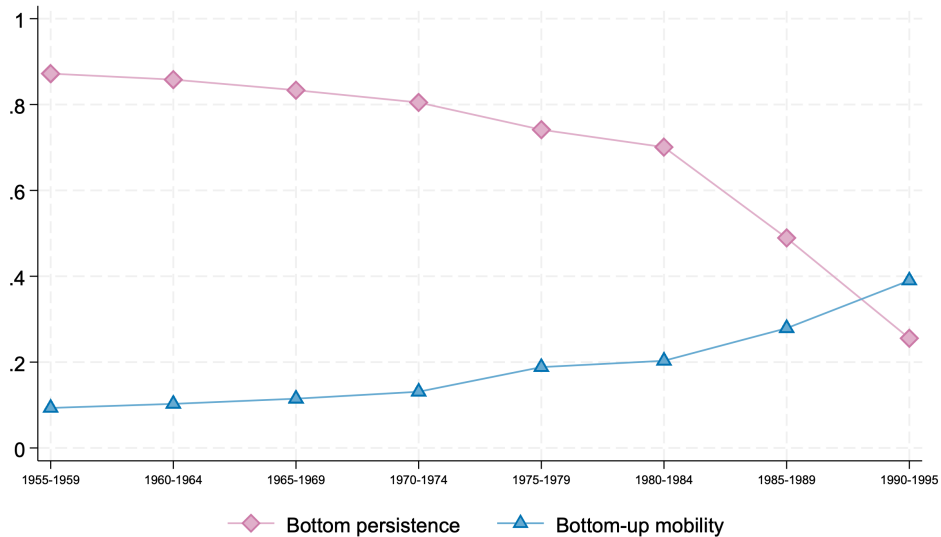

*Notes:* The figure reports cohort-specific transition probabilities for daughters born 1955-1995 who are aged at least 23 at interview, resided in Turkiye at age 12, and whose parents attained at most primary schooling. Each point is the weighted mean within 5-year birth-cohort bins, pooling all survey waves used in the analysis.

**Figure A5: Relative Mobility across Cohorts with Highest-educated Parent**

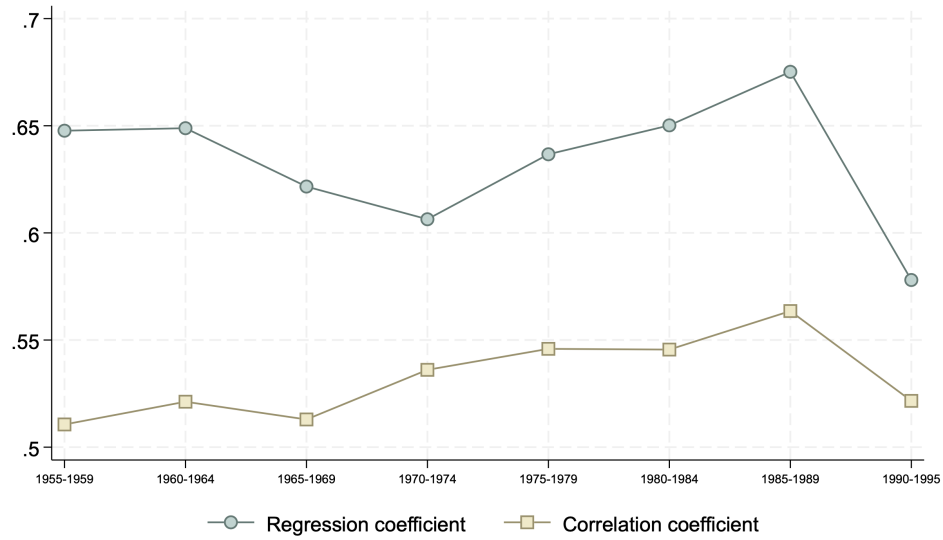

*Notes:* The figure reports cohort-specific measures of relative intergenerational educational mobility for daughters born 1955-1995 who are aged at least 23 at interview, and resided in Turkiye at age 12. Each point corresponds to estimates computed separately within 5-year birth-cohort bins, netting out survey-wave fixed effects and age. Confidence intervals are calculated using the bootstrap.

**Figure A6: Regional Distribution of Bottom Persistence with Highest-educated Parent**

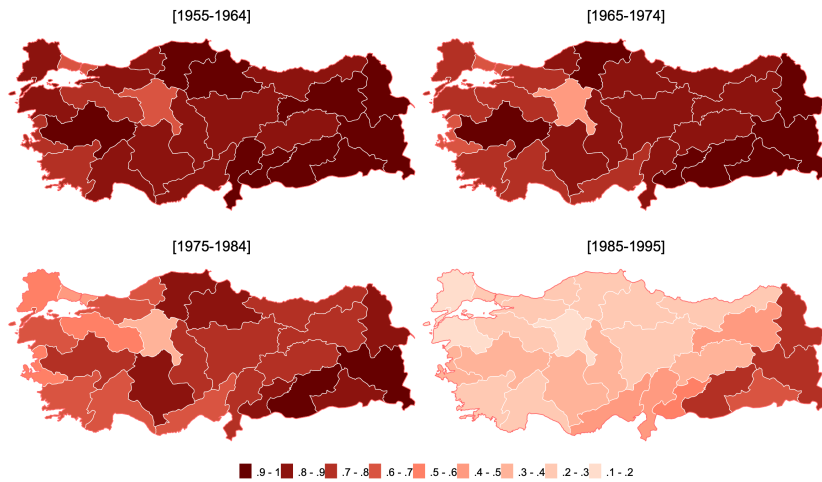

*Notes:* Each panel reports region-by-cohort estimates for 10-year birth-cohort bins. Individuals are assigned to regions using place of residence at age 12 and regions correspond to NUTS-2 statistical regions. All moments are computed using TDHS sampling weights. Darker shades indicate higher values, and bin cutoffs are held constant across cohorts for comparability.

**Figure A7:** Regional Distribution of Bottom-up Mobility with Highest-educated Parent

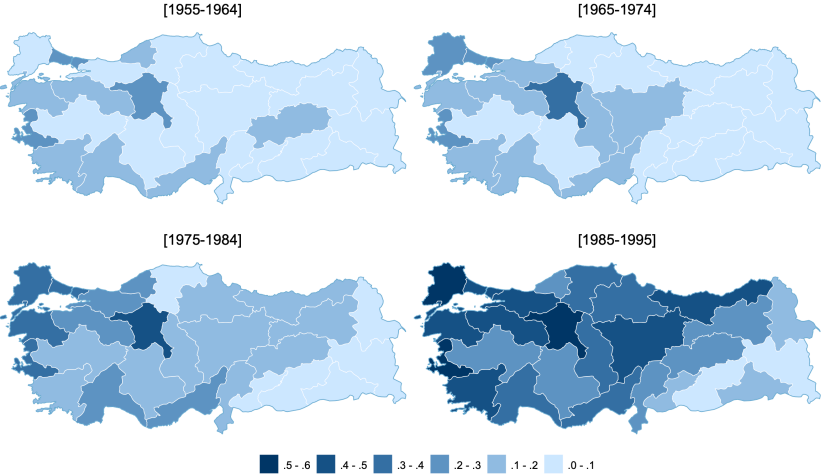

*Notes:* Each panel reports region-by-cohort estimates for 10-year birth-cohort bins. Individuals are assigned to regions using place of residence at age 12 and regions correspond to NUTS-2 statistical regions. All moments are computed using TDHS sampling weights. Darker shades indicate higher values, and bin cutoffs are held constant across cohorts for comparability.

**Figure A8:** Regional Distribution of Regression Coefficient with Highest-educated Parent

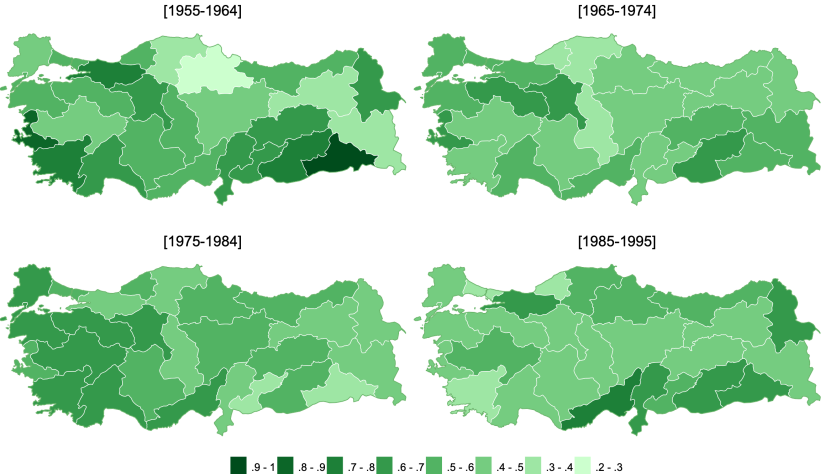

*Notes:* Each panel reports region-by-cohort estimates for 10-year birth-cohort bins. Individuals are assigned to regions using place of residence at age 12 and regions correspond to NUTS-2 statistical regions. Darker shades indicate lower mobility, and bin cutoffs are held constant across cohorts for comparability.

**Figure A9:** Regional Distribution of Correlation Coefficient with Highest-educated Parent

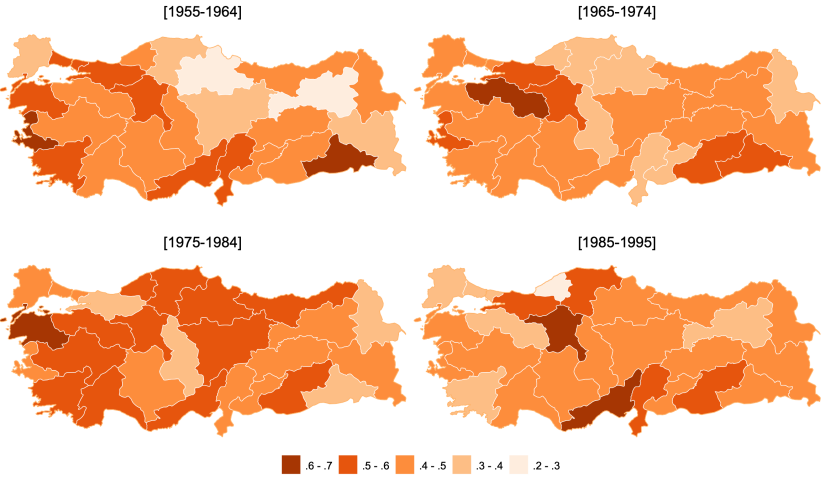

*Notes:* Each panel reports region-by-cohort estimates for 10-year birth-cohort bins. Individuals are assigned to regions using place of residence at age 12 and regions correspond to NUTS-2 statistical regions. Darker shades indicate lower mobility, and bin cutoffs are held constant across cohorts for comparability.

**Table A1:** Descriptive Statistics: Daughters and Highest-educated Parent

|                    | A. Daughter |          |           | B. Highest-Educated Parent |          |           |
|--------------------|-------------|----------|-----------|----------------------------|----------|-----------|
|                    | Mean        | St. dev. | # of obs. | Mean                       | St. dev. | # of obs. |
| Years of schooling | 6.64        | 4.38     | 26,425    | 4.40                       | 3.65     | 26,425    |
| Low educated (%)   | 64.86       | 47.74    | 26,425    | 83.64                      | 36.99    | 26,425    |
| High educated (%)  | 25.90       | 43.81    | 26,425    | 9.95                       | 29.94    | 26,425    |
| Age                | 35.39       | 7.46     | 26,425    |                            |          |           |

*Notes:* The sample is pooled from 2003, 2008, 2013, and 2018 TDHS. It includes the highest-educated parents in the household and their daughters who were born between 1955-1995, at least 23 at the survey year, resided in Turkiye at age 12. All statistics are calculated using sampling weights.
